# Supplementary material
Source: PubMed Central journal article supplement (PMC1989026)
Supplement: bmj_39300.616076.55_1.pdf [file bmj_39300.616076.55_1.pdf]

## Web references

- w1 Scientific Steering Committee on behalf of the Simon Broome Register Group. Risk of fatal coronary heart disease in familial hypercholesterolaemia. *BMJ* 1991;**303**:893-6
- w2 Vuorio AF, Turtola H, Kontula K. Neonatal Diagnosis of Familial Hypercholesterolemia in Newborns Born to a Parent With Molecularly Defined Heterozygous Familial Hypercholesterolemia. *Arterioscler Thromb vasc biol* 1997;17:3332-3337
- w3 Kwiterovich PO Jr, Levy RI, Fredrickson DS. Neonatal Diagnosis of Familial Type-II hyperlipoproteinaemia. *Lancet* 1973;1:118-121
- w4 Ohta T, Nakamura, R, Ikeda Y, Hattori S, Matsuda I. Follow up study of children with dyslipidemia detected by mass screening at 18 months of age: effect of 12 months of dietary treatment. *Eur J Pediatr* 1993;152:939-943
- w5 Vuorio AF, Turtola H, Piilhti K-M, Repo P, Kanninen T, Kontula K. Familial Hypercholesterolaemia in the Finnish North Karelia: A Molecular, Clinical and Genealogical Study. 1997 *Arterio Thromb Vasc Biol*;17:3127-3138
- w6 West RJ, Lloyd JK, Leonard JV. Long-term follow up of children with familial hypercholesterolaemia treated with cholestyramine. *Lancet* 1980;2: 873-875
- w7 Assouline L, Levy E, Feoli-Fonseca JC, Godbout C, Lambert M. Familial Hypercholesterolemia: Molecular, Biochemical and Clinical Characterization of a French-Canadian Pediatric Population. *Pediatrics* 1995;96:239-246
- w8 Wiegman A, Rodenberg J, de Jongh S, Defexche JC, Bakker HD, Kastelein JJP, Sijbrands EJG. Family History and cardiovascular Risk in Familial Hypercholesterolemia. *Circulation* 2003;107:1473-1478
- w9 Kwiterovich PO, Frederickson DS, Levy RI. Familial Hypercholesterolemia (One form of Type II Hyperbetalipoproteinemia) A study of its biochemical, genetic and clinical presentations in childhood. *J Clin Invest* 1974;53:1237-1249
- w10 Ketomaki A, Gylling H, Siimes MA, Vuorio A, Miettinen TA. Squalene and Noncholesterol Sterols in Serum Lipoproteins of Children with and without Familial Hypercholesterolemia. *Pediatr Res* 2003;53:648-653
- w11 Tonstad S, Aksnes L. Fat-soluble vitamin levels in familial hypercholesterolemia. *J Pediatr* 1997;130:270-80
- w12 Plasma Lipid Distributions in Selected North American Populations: The Lipid Research Clinics Program Prevalence Study. Lipid Research Clinics Program Epidemiology Committee. *Circulation* 1979;60:427-439

w13 Diet and Nutrition Survey 1986. [www.data-archive.ac.uk/findingData/snDescription.asp?sn=2836&key=2836&catg=xmlSn](http://www.data-archive.ac.uk/findingData/snDescription.asp?sn=2836&key=2836&catg=xmlSn)
